# Supplementary material
Source: PubMed Central journal article supplement (PMC1087723)

## Supplemental Figure

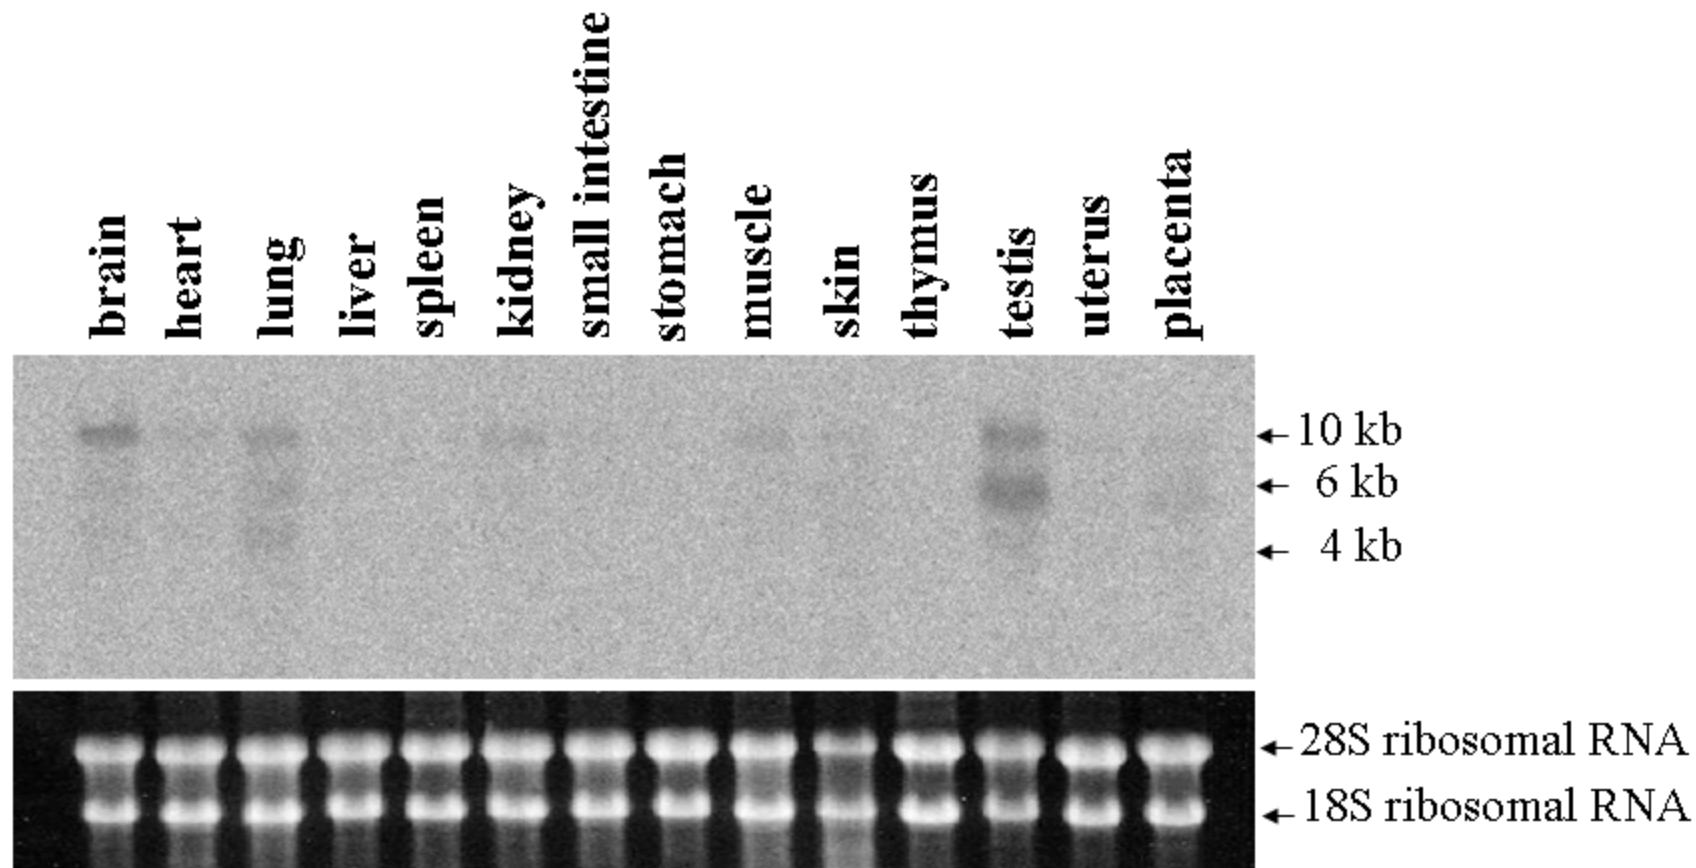

Supplement: molcellb_25_10_4138__1.pdf [file molcellb_25_10_4138__1.pdf]
